# Supplementary material
Source: PubMed Central journal article supplement (PMC4907096)
Supplement: MCB.00067-16_zmb999101247so1.pdf [file MCB.00067-16_zmb999101247so1.pdf]

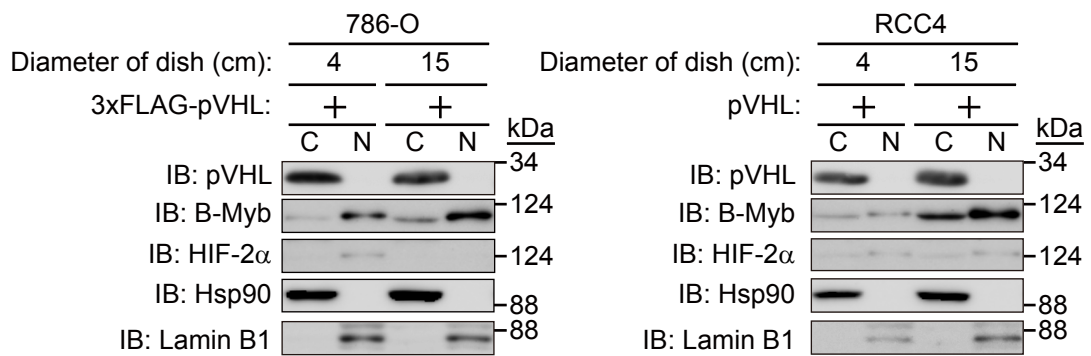

**Supplementary Figure S1. Cytosolic localization of pVHL in 786-O or RCC4 cells.**

786-O cells or RCC4 cells stably expressing pVHL or control cells were cultured under sparse or confluent conditions for 1 day. Cytosolic (C) and nuclear (N) fractions were immunoblotted (IB) with antibodies against pVHL, B-Myb, HIF-2 $\alpha$ , Hsp90, or Lamin B1. Hsp90 and Lamin B1 were used as cytosolic and nuclear protein markers, respectively.

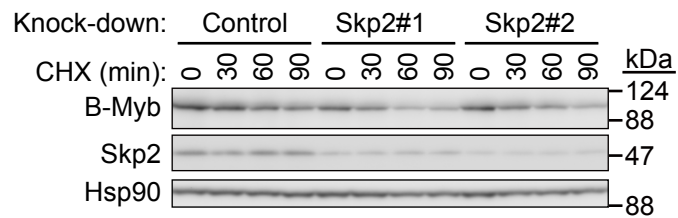

**Supplementary Figure S2. Stabilization of B-Myb is absent in Skp2 knockdown cells.**

Control 786-O cells or two independent Skp2 knockdown cell lines (#1 and #2) were cultured for 1 day under confluent conditions, and then exposed to CHX (50  $\mu$ g/ml) for 30, 60, or 90 min. The lysates were subjected to western blotting with antibodies against B-Myb, Skp2, or Hsp90.

Hsp90 was used as a loading control.

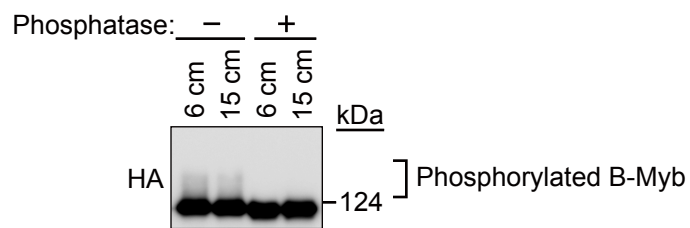

**Supplementary Figure S3. Phosphorylation of B-Myb under sparse or confluent culture conditions.**

3×HA-B-Myb expressing 786-O cells ( $3.8 \times 10^6$ ) were cultured for 1 day in two 6 cm (confluent condition) or three 15 cm (sparse condition) dishes. Immunoprecipitated 3×HA-B-Myb was incubated with or without phosphatase and subjected to western blotting with anti-HA antibody. The membrane was exposed for a relatively long time to detect phosphorylated 3×HA-B-Myb.

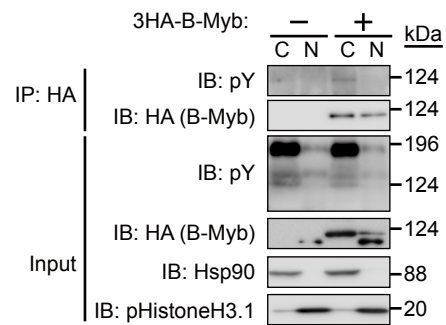

**Supplementary Figure S4. Tyrosine phosphorylation of B-Myb occurs in the cytosol.**

786-O cells stably expressing 3×HA-B-Myb or control cells were cultured under sparse conditions for 2 days. 3×HA-B-Myb was immunoprecipitated (IP) from the cytosolic (C) or nuclear (N) fraction with anti-HA antibody and immunoblotted (IB) with antibodies against pY, HA, Hsp90, or phosphorylated Histone 3.1. Hsp90 and phosphorylated Histone 3.1 were used as cytosolic and nuclear protein markers, respectively.

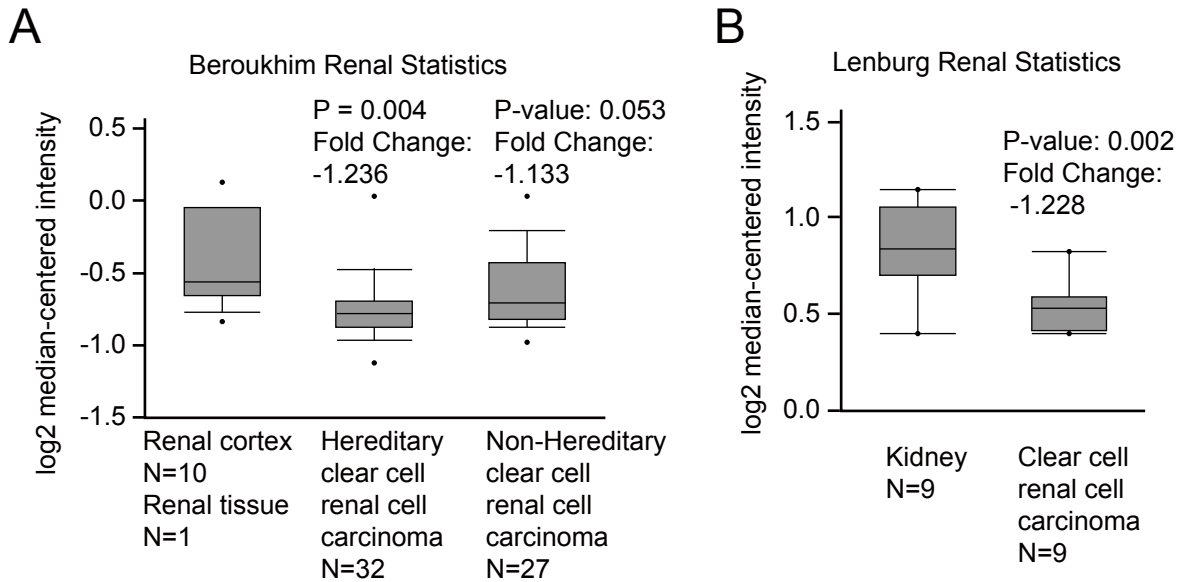

**Supplementary Figure S5. Downregulation of B-Myb in clear cell renal cell carcinoma.**

(A) Box plots of B-Myb transcript levels originally reported by Beroukhim et al., and provided by Oncomine data base. The box plot shows the normalized expression values, including minimum values (the bottom dot), 10<sup>th</sup> percentile (the bottom line outside the box), 25<sup>th</sup> percentile (the bottom border of the box), median (the middle line within the box), 75<sup>th</sup> percentile (the upper border of the box), 90<sup>th</sup> percentile (the upper line outside the box), and the maximum value (the upper dot). p values determined by Student' s t-test were provided by Oncomine and sample numbers in each group are indicated. (B) Box plots of B-Myb transcript levels originally reported by Lenburg et al., and provided by the Oncomine database are shown as in (A).

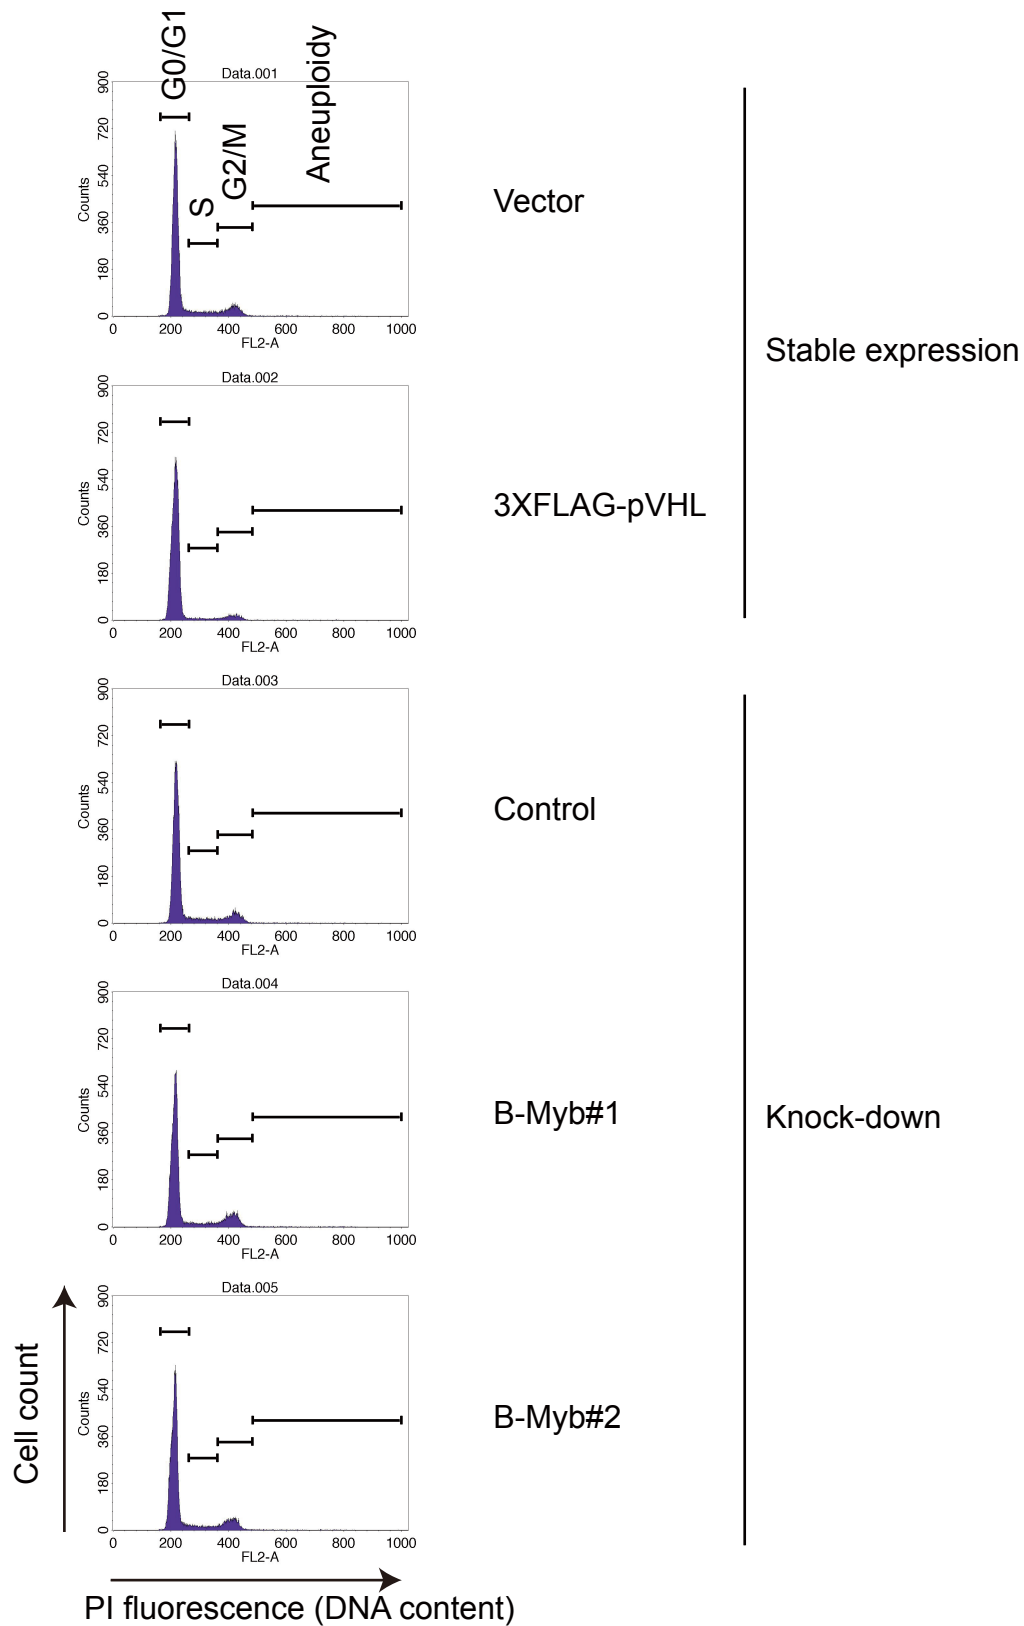

**Supplementary Figure S6. Representative flow cytometry data.**

Each cell line was harvested, fixed, and stained by propidium iodide to measure the DNA content of each cell. Cells in G0/G1, S, and G2/M phase, as well as aneuploidy are indicated.

**Tables S1**

Up-regulated genes by knock-down (KD) of B-Myb.

| Control (Log2) | B-Myb KD #1 (1B-Myb KD #2 (1 | GeneSymbol | Synonyms       | Description                                                               |                                                                                                                                        |
|----------------|------------------------------|------------|----------------|---------------------------------------------------------------------------|----------------------------------------------------------------------------------------------------------------------------------------|
| 0              | 6.478639                     | 2.8339624  | CXorf51A       | CXorf51                                                                   | Homo sapiens chromosome X open reading frame 51A (CXorf51A), mRNA [NM_001144064]                                                       |
| 0              | 4.7758408                    | 2.4837737  | OR1F1          | OR1F1                                                                     | Homo sapiens olfactory receptor, family 1, subfamily F, member 1 (OR1F1), mRNA [NM_012360]                                             |
| 0              | 4.359556                     | 1.0474968  | PRODH2         | HSPOX1                                                                    | Homo sapiens proline dehydrogenase (oxidase) 2 (PRODH2), mRNA [NM_021232]                                                              |
| 0              | 4.288799                     | 2.111652   | MYL3           | CMH8 MLC1SB MLC1V                                                         | Homo sapiens myosin, light chain 3, alkali; ventricular, skeletal, slow (MYL3), mRNA [NM_000258]                                       |
| 0              | 3.8127947                    | 1.3498459  | C20orf160      | dJ310013.5                                                                | Homo sapiens chromosome 20 open reading frame 160 (C20orf160), mRNA [NM_080625]                                                        |
| 0              | 3.6173735                    | 2.112893   | XLOC_001280    |                                                                           | BROAD Institute lincRNA (XLOC_001280), lincRNA [TCONS_00001895]                                                                        |
| 0              | 3.5501838                    | 3.7551284  | GRIK1-AS1      | C21orf9 GRIK1-AS GRI1                                                     | Homo sapiens GRIK1 antisense RNA 1 (non-protein coding) (GRIK1-AS1), non-coding RNA [NR_027021]                                        |
| 0              | 3.4837155                    | 1.3371539  | ASB2           | ASB-2                                                                     | Homo sapiens ankyrin repeat and SOCS box containing 2 (ASB2), transcript variant 2, mRNA [NM_016150]                                   |
| 0              | 3.305637                     | 1.0225792  | XLOC_005633    |                                                                           | BROAD Institute lincRNA (XLOC_005633), lincRNA [TCONS_00012103]                                                                        |
| 0              | 3.2275786                    | 2.761517   | XLOC_001515    |                                                                           | Q588E3.BRALA (Q588E3) NADH dehydrogenase subunit 5, partial (4%) [THC2710260]                                                          |
| 0              | 3.2029433                    | 2.2500253  | HTR1E          | 5-HT1E                                                                    | Homo sapiens 5-hydroxytryptamine (serotonin) receptor 1E (HTR1E), mRNA [NM_000865]                                                     |
| 0              | 3.0973997                    | 1.9756703  | NTNG2          | LHLL9381 Lmmt2 NTNG                                                       | Homo sapiens netrin G2 (NTNG2), mRNA [NM_032536]                                                                                       |
| 0              | 3.0855465                    | 1.4855504  | MGC39584       |                                                                           | Homo sapiens uncharacterized LOC441058 (MGC39584), non-coding RNA [NR_038377]                                                          |
| 0              | 3.0525799                    | 3.6732097  | GPR182         | 7TMR ADMR AM-R AMF                                                        | Homo sapiens G protein-coupled receptor 182 (GPR182), mRNA [NM_007264]                                                                 |
| 0              | 2.9833083                    | 1.7624488  | XLOC_012626    |                                                                           | BROAD Institute lincRNA (XLOC_012626), lincRNA [TCONS_00026599]                                                                        |
| 0              | 2.9559507                    | 1.6974177  | CDH13          | CDHH P105                                                                 | Homo sapiens cadherin 13, H-cadherin (heart) (CDH13), transcript variant 1, mRNA [NM_001257]                                           |
| 0              | 2.8441734                    | 1.3601489  | IRGM           | IFI1 IRGM1 LRG-47 LRC                                                     | immunity-related GTPase family, M [Source:HGNC Symbol;Acc:29597] [ENST00000520549]                                                     |
| 0              | 2.7894664                    | 1.1142297  | XLOC_003422    |                                                                           | BROAD Institute lincRNA (XLOC_003422), lincRNA [TCONS_00008740]                                                                        |
| 0              | 2.7776098                    | 2.6871138  | XLOC_I2_009449 |                                                                           | PREDICTED: Homo sapiens von Willebrand factor-like (LOC100289038), miscRNA [XR_132906]                                                 |
| 0              | 2.6427112                    | 1.7254534  | LOC100507165   |                                                                           | PREDICTED: Homo sapiens hypothetical LOC100507165 (LOC100507165), miscRNA [XR_110530]                                                  |
| 0              | 2.501556                     | 1.4363832  | MS4A7          | 4SPAN2 CD20L4 CFFM                                                        | Homo sapiens membrane-spanning 4-domains, subfamily A, member 7 (MS4A7), transcript variant 1, mRNA [NM_021201]                        |
| 0              | 2.4425755                    | 1.05651    | LOC100652810   |                                                                           | PREDICTED: Homo sapiens beta-glucuronidase-like protein SMA5-like (LOC100652810), mRNA [XM_003403424]                                  |
| 0              | 2.4330044                    | 1.1088257  | LOC441025      |                                                                           | Homo sapiens uncharacterized LOC441025 (LOC441025), non-coding RNA [NR_033964]                                                         |
| 0              | 2.3985472                    | 2.4625416  | CFB            | AHUS4 BF BFD CFAB F                                                       | Homo sapiens complement factor B (CFB), mRNA [NM_001710]                                                                               |
| 0              | 2.3705273                    | 1.8792772  | LOC100270679   |                                                                           | Homo sapiens uncharacterized LOC100270679 (LOC100270679), non-coding RNA [NR_038394]                                                   |
| 0              | 2.3565202                    | 1.1855254  | XLOC_008706    |                                                                           | Q4RGK4.TETNG (Q4RGK4) Chromosome undetermined SCAF15099, whole genome shotgun sequence, partial (6%) [THC2710827]                      |
| 0              | 2.310853                     | 1.1752496  | MYH8           | MyHC-peri MyHC-pn gtl                                                     | Homo sapiens myosin, heavy chain 8, skeletal muscle, perinatal (MYH8), mRNA [NM_002472]                                                |
| 0              | 2.295967                     | 2.3189268  | XLOC_001011    |                                                                           |                                                                                                                                        |
| 0              | 2.2576122                    | 1.405354   | ZNF287         | ZKSCAN13                                                                  | Homo sapiens zinc finger protein 287 (ZNF287), mRNA [NM_020653]                                                                        |
| 0              | 2.2535315                    | 1.3091903  | HOXA13         | HOX1 HOX1J                                                                | Homo sapiens homeobox A13 (HOXA13), mRNA [NM_000522]                                                                                   |
| 0              | 2.1676388                    | 1.2138968  | FLJ10038       |                                                                           | Homo sapiens uncharacterized protein FLJ10038 (FLJ10038), non-coding RNA [NR_026891]                                                   |
| 0              | 2.167531                     | 1.0258718  |                |                                                                           | Uncharacterized protein [Source:UniProtKB/TrEMBL;Acc:B5MCS7] [ENST00000431083]                                                         |
| 0              | 2.1431608                    | 1.7853184  | XLOC_010505    |                                                                           | BROAD Institute lincRNA (XLOC_010505), lincRNA [TCONS_00021602]                                                                        |
| 0              | 2.1422071                    | 1.5446191  | PVALB          | D22S749                                                                   | Homo sapiens parvalbumin (PVALB), mRNA [NM_002854]                                                                                     |
| 0              | 2.0430498                    | 1.3493695  | 6-Sep          | SEP2 SEPT2                                                                | Homo sapiens septin 6 (SEPT6), transcript variant V, mRNA [NM_145802]                                                                  |
| 0              | 2.0313535                    | 1.2817521  | STAG2          | SA-2 SA2 SCC3B ba51                                                       | stromal antigen 2 [Source:HGNC Symbol;Acc:11355] [ENST00000394478]                                                                     |
| 0              | 2.0214806                    | 1.4171662  |                |                                                                           | Homo sapiens mRNA for hypothetical protein (C8ORF16). [AJ312026]                                                                       |
| 0              | 2.0078535                    | 1.0275364  | GPR64          | EDDM6 HE6 TM7LN2                                                          | Homo sapiens G protein-coupled receptor 64 (GPR64), transcript variant 1, mRNA [NM_001079858]                                          |
| 0              | 2.0017781                    | 1.2358885  | FKBP1B         | FKBP12.6 FKBP1L OTK                                                       | Homo sapiens FK506 binding protein 1B, 12.6 kDa (FKBP1B), transcript variant 2, mRNA [NM_054033]                                       |
| 0              | 1.9999866                    | 1.0277762  | BAI2           |                                                                           | Homo sapiens brain-specific angiogenesis inhibitor 2 (BAI2), mRNA [NM_001703]                                                          |
| 0              | 1.9957113                    | 1.3284645  | SNORD1A        |                                                                           | Homo sapiens small nucleolar RNA, C/D box 1A (SNORD1A), small nucleolar RNA [NR_004395]                                                |
| 0              | 1.9851193                    | 1.0844498  | GNAS           | AHO C20orf45 GNAS1 C                                                      | Homo sapiens GNAS complex locus (GNAS), transcript variant 4, mRNA [NM_016592]                                                         |
| 0              | 1.9834514                    | 1.0348482  | PCSK6          | PACE4 SPC4                                                                | Homo sapiens proprotein convertase subtilisin/kexin type 6 (PCSK6), transcript variant 1, mRNA [NM_002570]                             |
| 0              | 1.9768505                    | 1.2931824  | FABP1          | FABPL L-FABP                                                              | Homo sapiens fatty acid binding protein 1, liver (FABP1), mRNA [NM_001443]                                                             |
| 0              | 1.9675765                    | 1.78934    | NID1           | NID                                                                       | Homo sapiens nidogen 1 (NID1), mRNA [NM_002508]                                                                                        |
| 0              | 1.8828597                    | 1.02493    |                |                                                                           | family with sequence similarity 95, member B1 [Source:HGNC Symbol;Acc:32318] [ENST00000455995]                                         |
| 0              | 1.8568211                    | 1.0869699  | SARM1          | SAMD2 SARM                                                                | Homo sapiens sterile alpha and TIR motif containing 1 (SARM1), mRNA [NM_015077]                                                        |
| 0              | 1.8383904                    | 1.1714616  | TGM1           | ICR2 KTG2 LI1 TGASE                                                       | Homo sapiens transglutaminase 1 (K polypeptide epidermal type I, protein-glutamine-gamma-glutamyltransferase) (TGM1), mRNA [NM_000359] |
| 0              | 1.7247868                    | 1.079649   | KRTAP5-5       | KRTAP5-11 KRTAP5.5                                                        | Homo sapiens keratin associated protein 5-5 (KRTAP5-5), mRNA [NM_001001480]                                                            |
| 0              | 1.7216353                    | 1.4337659  | TMEM98         |                                                                           | Homo sapiens transmembrane protein 98 (TMEM98), transcript variant 1, mRNA [NM_015544]                                                 |
| 0              | 1.720727                     | 1.5358481  | LIMS2          | PINCH-2 PINCH2                                                            | Homo sapiens LIM and senescent cell antigen-like domains 2 (LIMS2), transcript variant 5, mRNA [NM_001161404]                          |
| 0              | 1.6468544                    | 1.6294508  | AFF1           | AF4 FMR2 family, member 1 [Source:HGNC Symbol;Acc:7135] [ENST00000504956] |                                                                                                                                        |
| 0              | 1.6038527                    | 1.1272345  | 6-Sep          | SEP2 SEPT2                                                                | Homo sapiens septin 6 (SEPT6), transcript variant V, mRNA [NM_145802]                                                                  |
| 0              | 1.5640907                    | 1.122921   | XLOC_I2_011114 |                                                                           | DB520446 RIKEN full-length enriched human cDNA library, testis Homo sapiens cDNA clone H013067K21 3', mRNA sequence [DB520446]         |
| 0              | 1.5218167                    | 1.0063677  | XLOC_003854    |                                                                           | BROAD Institute lincRNA (XLOC_003854), lincRNA [TCONS_00009008]                                                                        |
| 0              | 1.4579005                    | 1.2917061  | CPA6           | CPAH ETL5 FEB11                                                           | Homo sapiens carboxypeptidase A6 (CPA6), mRNA [NM_020361]                                                                              |

|   |           |           |                |                    |                                                                                                                        |
|---|-----------|-----------|----------------|--------------------|------------------------------------------------------------------------------------------------------------------------|
| 0 | 1.4542112 | 1.1074753 | REEP2          | C5orf19 SGC32445   | Homo sapiens receptor accessory protein 2 (REEP2), mRNA [NM_016606]                                                    |
| 0 | 1.4520159 | 1.0432749 | SYNGR1         |                    | Homo sapiens synaptogyrin 1 (SYNGR1), transcript variant 1b, mRNA [NM_145731]                                          |
| 0 | 1.4413638 | 1.0627213 | C21orf56       |                    | Homo sapiens chromosome 21 open reading frame 56 (C21orf56), transcript variant 2, mRNA [NM_032261]                    |
| 0 | 1.4074268 | 2.9002943 | TESC           | CHP3 TSC           | Homo sapiens tescalcin (TESC), transcript variant 1, mRNA [NM_017899]                                                  |
| 0 | 1.4016399 | 1.2406483 |                |                    | immunoglobulin kappa variable 2D-28 [Source:HGNC Symbol;Acc:5799] [ENST00000453166]                                    |
| 0 | 1.3708653 | 1.2831597 | GPRASP1        | GASP GASP-1 GASP1  | Homo sapiens G protein-coupled receptor associated sorting protein 1 (GPRASP1), transcript variant 1, mRNA [NM_014710] |
| 0 | 1.367857  | 1.0640779 | LOC100507520   |                    | PREDICTED: Homo sapiens hypothetical LOC100507520, transcript variant 2 (LOC100507520), miscRNA [XR_109440]            |
| 0 | 1.3674645 | 1.1025324 | LOC400043      |                    | Homo sapiens uncharacterized LOC400043 (LOC400043), non-coding RNA [NR_026656]                                         |
| 0 | 1.3149586 | 1.010797  | XLOC_007433    |                    | MR3-FN0206-020201-006-h05 FN0206 Homo sapiens cDNA, mRNA sequence [BI046002]                                           |
| 0 | 1.2779694 | 1.2874107 | COL6A2         | PP3610             | Homo sapiens collagen, type VI, alpha 2 (COL6A2), transcript variant 2C2a, mRNA [NM_058174]                            |
| 0 | 1.2360439 | 1.0344882 | EFNB3          | EFL6 EPLG8 LERK8   | Homo sapiens ephrin-B3 (EFNB3), mRNA [NM_001406]                                                                       |
| 0 | 1.2226591 | 1.3807235 | UBE2Q2P2       | UBE2QP2            | Homo sapiens ubiquitin-conjugating enzyme E2Q family member 2 pseudogene 2 (UBE2Q2P2), non-coding RNA [NR_004847]      |
| 0 | 1.1912475 | 1.2277179 | XLOC_I2_013506 |                    | BX097862 NCI_CGAP_Kid5 Homo sapiens cDNA clone IMAGp998D083986, mRNA sequence [BX097862]                               |
| 0 | 1.1564093 | 1.037571  | C17orf28       | DMC1               | Homo sapiens chromosome 17 open reading frame 28 (C17orf28), mRNA [NM_030630]                                          |
| 0 | 1.1455102 | 1.1972079 | C5orf56        |                    | Homo sapiens cDNA: FLJ21568 fis, clone COL06492. [AK025221]                                                            |
| 0 | 1.1242619 | 1.5627937 | DLG3           | MRX MRX90 NEDLG SA | Homo sapiens discs, large homolog 3 (Drosophila) (DLG3), transcript variant 1, mRNA [NM_021120]                        |
| 0 | 1.1171088 | 1.8100896 | XLOC_004747    |                    | BROAD Institute lincRNA (XLOC_004747), lincRNA [TCONS_00009612]                                                        |
| 0 | 1.104301  | 1.080823  | ZNF780B        | ZNF779             | Homo sapiens zinc finger protein 780B (ZNF780B), mRNA [NM_001005851]                                                   |
| 0 | 1.0958476 | 1.0104222 | AXIN2          | AXIL               | Homo sapiens axin 2 (AXIN2), mRNA [NM_004655]                                                                          |
| 0 | 1.0128231 | 1.0061951 | RIMS3          | NIM3 RIM3          | Homo sapiens regulating synaptic membrane exocytosis 3 (RIMS3), mRNA [NM_014747]                                       |



**Tables S2**

Down-regulated genes by knock-down (KD) of B-Myb.

| Control (Log2) | B-Myb KD #1 (l | B-Myb KD #2 (l | GeneSymbol     | Synonyms               | Description                                                                                                                    |
|----------------|----------------|----------------|----------------|------------------------|--------------------------------------------------------------------------------------------------------------------------------|
| 0              | -9.51674       | -7.927818      | ZUFSP          | C6orf113 dJ41217.3     | Homo sapiens zinc finger with UFM1-specific peptidase domain (ZUFSP), mRNA [NM_145062]                                         |
| 0              | -8.877529      | -9.169393      | LOC144571      |                        | Homo sapiens uncharacterized LOC144571 (LOC144571), non-coding RNA [NR_026971]                                                 |
| 0              | -6.307118      | -7.574066      | CASN2          | CASB                   | Homo sapiens casein beta (CASN2), mRNA [NM_001891]                                                                             |
| 0              | -5.929298      | -7.5290947     | CCDC85A        |                        | Homo sapiens coiled-coil domain containing 85A (CCDC85A), mRNA [NM_001080433]                                                  |
| 0              | -5.782954      | -6.978011      | XLOC_002117    |                        | BROAD Institute lincRNA (XLOC_002117), lincRNA [TCONS_00002753]                                                                |
| 0              | -5.6845465     | -6.7729983     | LOC100128105   |                        | PREDICTED: Homo sapiens hypothetical protein LOC100128105 (LOC100128105), mRNA [XM_001721678]                                  |
| 0              | -5.6487446     | -6.8472533     | XLOC_002975    |                        | BROAD Institute lincRNA (XLOC_002975), lincRNA [TCONS_00006355]                                                                |
| 0              | -5.616104      | -6.882144      | XLOC_010696    |                        | BROAD Institute lincRNA (XLOC_010696), lincRNA [TCONS_00021689]                                                                |
| 0              | -5.5685883     | -6.770891      | ECM2           |                        | extracellular matrix protein 2, female organ and adipocyte specific [Source:HGNC Symbol;Acc:3154] [ENST00000375540]            |
| 0              | -5.333523      | -6.5285816     | LINC00305      | C18orf20 HsT1235 NCRI  | Homo sapiens long intergenic non-protein coding RNA 305 (LINC00305), non-coding RNA [NR_027245]                                |
| 0              | -5.3260207     | -5.6772423     | MST1           |                        | BROAD Institute lincRNA (XLOC_I2_000080), lincRNA [TCONS_I2_00000119]                                                          |
| 0              | -5.1531777     | -5.5154915     | XLOC_012296    |                        | BROAD Institute lincRNA (XLOC_012296), lincRNA [TCONS_00025127]                                                                |
| 0              | -4.9742327     | -4.8544908     | FAM126A        | DRCTNNB1A HCC HLDf     | family with sequence similarity 126, member A [Source:HGNC Symbol;Acc:24587] [ENST00000409763]                                 |
| 0              | -4.930912      | -5.1353273     | LOC100130445   |                        | PREDICTED: Homo sapiens hypothetical protein LOC100130445 (LOC100130445), mRNA [XM_001715069]                                  |
| 0              | -4.87822       | -3.791369      | THBS2          | TSP2                   | Homo sapiens thrombospondin 2 (THBS2), mRNA [NM_003247]                                                                        |
| 0              | -4.8568244     | -6.0495753     | PRSS55         | T-SP1 UNQ9391          | Homo sapiens protease, serine, 55 (PRSS55), transcript variant 1, mRNA [NM_198464]                                             |
| 0              | -4.7727103     | -5.1938114     | XLOC_003677    |                        | BROAD Institute lincRNA (XLOC_003677), lincRNA [TCONS_00008880]                                                                |
| 0              | -4.6143646     | -5.7510104     | XLOC_011218    |                        | BROAD Institute lincRNA (XLOC_011218), lincRNA [TCONS_00023364]                                                                |
| 0              | -4.6013403     | -5.825031      | XLOC_002643    |                        | BROAD Institute lincRNA (XLOC_002643), lincRNA [TCONS_00006017]                                                                |
| 0              | -4.6006675     | -5.7839346     | LOC645355      |                        | Homo sapiens uncharacterized LOC645355 (LOC645355), non-coding RNA [NR_038839]                                                 |
| 0              | -4.5485435     | -5.35522       | ATP2B2         | PMCA2 PMCA2a PMCA      | Homo sapiens ATPase, Ca++ transporting, plasma membrane 2 (ATP2B2), transcript variant 1, mRNA [NM_001001331]                  |
| 0              | -4.5454006     | -5.8075333     | XLOC_I2_006449 |                        | BROAD Institute lincRNA (XLOC_I2_006449), lincRNA [TCONS_I2_00012046]                                                          |
| 0              | -4.444984      | -5.2535195     | XLOC_012664    |                        | BROAD Institute lincRNA (XLOC_012664), lincRNA [TCONS_00026615]                                                                |
| 0              | -4.2319274     | -4.2769756     |                |                        | Homo sapiens cDNA FLJ35175 fis, clone PLACE6013400. [AK092494]                                                                 |
| 0              | -4.166102      | -4.4578247     | PNPLA1         | dJ50J22.1              | Homo sapiens patatin-like phospholipase domain containing 1 (PNPLA1), transcript variant 3, mRNA [NM_001145717]                |
| 0              | -4.0718365     | -5.2663674     |                |                        | DB063160 TEST14 Homo sapiens cDNA clone TEST14003540 5', mRNA sequence [DB063160]                                              |
| 0              | -4.0558114     | -5.225694      | XLOC_I2_011996 |                        | BROAD Institute lincRNA (XLOC_I2_011996), lincRNA [TCONS_I2_00022844]                                                          |
| 0              | -3.9620466     | -5.1002984     | XLOC_002060    |                        | BX119243 NCI_CGAP_GC6 Homo sapiens cDNA clone IMAGp998E185714, mRNA sequence [BX119243]                                        |
| 0              | -3.886845      | -1.075253      | LOC100192378   |                        | Homo sapiens uncharacterized LOC100192378 (LOC100192378), non-coding RNA [NR_024360]                                           |
| 0              | -3.8817153     | -5.074789      | XLOC_002886    |                        | BROAD Institute lincRNA (XLOC_002886), lincRNA [TCONS_00006283]                                                                |
| 0              | -3.788311      | -4.979326      | STON1-GTF2A1L  | SALF                   | Homo sapiens STON1-GTF2A1L readthrough (STON1-GTF2A1L), transcript variant 2, mRNA [NM_001198593]                              |
| 0              | -3.787363      | -4.9814124     |                |                        | PREDICTED: Homo sapiens putative tripartite motif-containing protein 64B-like (LOC642414), mRNA [XM_003119181]                 |
| 0              | -3.7613955     | -4.952389      | XLOC_012387    |                        | BROAD Institute lincRNA (XLOC_012387), lincRNA [TCONS_00025558]                                                                |
| 0              | -3.7003908     | -5.941253      | XLOC_009927    |                        | BROAD Institute lincRNA (XLOC_009927), lincRNA [TCONS_00020612]                                                                |
| 0              | -3.6420188     | -4.8440146     | RD3            | C1orf36 LCA12          | Homo sapiens retinal degeneration 3 (RD3), transcript variant 1, mRNA [NM_183059]                                              |
| 0              | -3.6265435     | -4.828403      | LOC100652927   |                        | PREDICTED: Homo sapiens hypothetical LOC100652927 (LOC100652927), miscRNA [XR_132642]                                          |
| 0              | -3.57684       | -4.84187       | LOC285556      |                        | PREDICTED: Homo sapiens hypothetical protein LOC285556 (LOC285556), mRNA [XM_001717423]                                        |
| 0              | -3.5756984     | -4.772544      | ASB15          |                        | Homo sapiens ankyrin repeat and SOCS box containing 15 (ASB15), mRNA [NM_080928]                                               |
| 0              | -3.51304       | -4.6876802     | STAT4          | SLEB11                 | Homo sapiens signal transducer and activator of transcription 4 (STAT4), transcript variant 1, mRNA [NM_003151]                |
| 0              | -3.5029874     | -4.7016544     | TSKS           | STK22S1 TSKS1 TSSKS    | Homo sapiens testis-specific serine kinase substrate (TSKS), mRNA [NM_021733]                                                  |
| 0              | -3.4644852     | -4.8650804     | XLOC_013308    |                        | BROAD Institute lincRNA (XLOC_013308), lincRNA [TCONS_00027310]                                                                |
| 0              | -3.4471517     | -1.9599371     | XLOC_010243    |                        | BROAD Institute lincRNA (XLOC_010243), lincRNA [TCONS_00020974]                                                                |
| 0              | -3.37919       | -4.5374866     | ADHFE1         | ADH8 HOT               | Homo sapiens alcohol dehydrogenase, iron containing, 1 (ADHFE1), nuclear gene encoding mitochondrial protein, mRNA [NM_144650] |
| 0              | -3.330854      | -3.6544585     | STRC           | DFNB16                 | Homo sapiens stereocilin (STRC), mRNA [NM_153700]                                                                              |
| 0              | -3.2498999     | -4.443956      | OSTalpha       | OSTA OSTalpha          | Homo sapiens organic solute transporter alpha (OSTalpha), mRNA [NM_152672]                                                     |
| 0              | -3.2351675     | -4.4480543     | XLOC_008428    |                        | BROAD Institute lincRNA (XLOC_008428), lincRNA [TCONS_00018149]                                                                |
| 0              | -3.2290535     | -4.3479714     | XLOC_010707    |                        | 601122985F1 NIH_MGC_20 Homo sapiens cDNA clone IMAGE:3347061 5', mRNA sequence [BE276051]                                      |
| 0              | -3.207963      | -1.1184835     | ANO3           | C11orf25 TMEM16C       | Homo sapiens anoctamin 3 (ANO3), mRNA [NM_031418]                                                                              |
| 0              | -3.1598964     | -2.5124898     | RBPJL          | RBP-L RBPSUHL SUH      | Homo sapiens recombination signal binding protein for immunoglobulin kappa J region-like (RBPJL), mRNA [NM_014276]             |
| 0              | -3.157442      | -2.5432901     | LOC642852      |                        | Homo sapiens uncharacterized LOC642852 (LOC642852), non-coding RNA [NR_026943]                                                 |
| 0              | -3.1509867     | -4.345913      | XKR9           |                        | BROAD Institute lincRNA (XLOC_006836), lincRNA [TCONS_00014752]                                                                |
| 0              | -3.1093469     | -4.280808      | CATSPERB       | C14orf161 CatSper(beta | Homo sapiens cation channel, sperm-associated, beta (CATSPERB), mRNA [NM_024764]                                               |
| 0              | -3.0562968     | -2.7815423     | SUN5           | SPAG4L TSARG4 dJ72f    | Homo sapiens Sad1 and UNC84 domain containing 5 (SUN5), mRNA [NM_080675]                                                       |
| 0              | -3.0450087     | -2.8538857     |                |                        | DB461001 RIKEN full-length enriched human cDNA library, testis Homo sapiens cDNA clone H013092F08 5', mRNA sequence [DB461001] |
| 0              | -3.03692       | -4.090977      | XLOC_000095    |                        | BROAD Institute lincRNA (XLOC_000095), lincRNA [TCONS_00000867]                                                                |
| 0              | -3.0244532     | -1.720139      | ZNF585A        |                        | Homo sapiens zinc finger protein 585A (ZNF585A), transcript variant 1, mRNA [NM_152655]                                        |
| 0              | -3.0156965     | -2.3005567     | SNORA79        |                        | Homo sapiens small nucleolar RNA, H/ACA box 79 (SNORA79), small nucleolar RNA [NR_003021]                                      |

|   |            |            |                |                                                                                                                                                 |
|---|------------|------------|----------------|-------------------------------------------------------------------------------------------------------------------------------------------------|
| 0 | -2.9745045 | -3.0923657 | XLOC_012751    | BROAD Institute lincRNA (XLOC_012751), lincRNA [TCONS_00026401]                                                                                 |
| 0 | -2.9627347 | -4.098775  | XLOC_001501    | xv14h03.x1 Soares_NFL_T_GBC_S1 Homo sapiens cDNA clone IMAGE:2813141 3', mRNA sequence [AW272487]                                               |
| 0 | -2.9103017 | -4.105273  | XLOC_013577    | BX113703 Soares_testis_NHT Homo sapiens cDNA clone IMAGp998E101784, mRNA sequence [BX113703]                                                    |
| 0 | -2.907257  | -1.8104877 | XLOC_I2_012210 | BROAD Institute lincRNA (XLOC_I2_012210), lincRNA [TCONS_I2_00023092]                                                                           |
| 0 | -2.873784  | -4.086891  | XLOC_005633    | BROAD Institute lincRNA (XLOC_005633), lincRNA [TCONS_00012676]                                                                                 |
| 0 | -2.8716974 | -2.7140217 | CACHD1         | RP4-655E10.1 Homo sapiens cache domain containing 1 (CACHD1), mRNA [NM_020925]                                                                  |
| 0 | -2.855507  | -4.05605   |                | Uncharacterized protein [Source:UniProtKB/TrEMBL;Acc:E7EUI4] [ENST00000314552]                                                                  |
| 0 | -2.8550596 | -4.0965776 | XLOC_I2_014694 | BX118352 Soares_testis_NHT Homo sapiens cDNA clone IMAGp998L221795, mRNA sequence [BX118352]                                                    |
| 0 | -2.8040504 | -3.989108  | XLOC_005465    | BROAD Institute lincRNA (XLOC_005465), lincRNA [TCONS_00011372]                                                                                 |
| 0 | -2.8008428 | -3.9956074 | LOC100129884   | Homo sapiens cDNA FLJ39760 fis, clone SMINT2019200. [AK097079]                                                                                  |
| 0 | -2.7885814 | -4.605114  | CASP12         | CASP-12 CASP12P1 Homo sapiens caspase 12 (gene/pseudogene) (CASP12), transcript variant 1, mRNA [NM_001191016]                                  |
| 0 | -2.7719617 | -3.3725214 | ENOX1          | CNOX PIG38 bA64J21.1 Homo sapiens ecto-NOX disulfide-thiol exchanger 1 (ENOX1), transcript variant 1, mRNA [NM_017993]                          |
| 0 | -2.7353559 | -3.9365668 | LOC731424      | Homo sapiens uncharacterized LOC731424 (LOC731424), non-coding RNA [NR_037867]                                                                  |
| 0 | -2.7169557 | -2.3692856 | MTMR9          | C8orf9 LIP-STYX MTMF Homo sapiens myotubularin related protein 9 (MTMR9), mRNA [NM_015458]                                                      |
| 0 | -2.699048  | -3.8897738 |                | Uncharacterized protein cDNA FLJ34594 fis, clone KIDNE2009109 [Source:UniProtKB/TrEMBL;Acc:Q8NAX6] [ENST00000314040]                            |
| 0 | -2.6855206 | -4.777762  | CELF4          | BRUNOL-4 BRUNOL4 Homo sapiens CUGBP, Elav-like family member 4 (CELF4), transcript variant 1, mRNA [NM_020180]                                  |
| 0 | -2.6848354 | -2.1676302 | MYEOV2         | Homo sapiens myeloma overexpressed 2 (MYEOV2), transcript variant 1, mRNA [NM_138336]                                                           |
| 0 | -2.6769452 | -2.5557427 | SLC9A10        | SLC9A10 sperm-NHE Homo sapiens solute carrier family 9, member 10 (SLC9A10), mRNA [NM_183061]                                                   |
| 0 | -2.6727767 | -2.723853  | KCNE4          | MIRP3 Homo sapiens potassium voltage-gated channel, Isk-related family, member 4 (KCNE4), mRNA [NM_080671]                                      |
| 0 | -2.6712766 | -3.8618083 | STRA6          | MCOPS9 Homo sapiens stimulated by retinoic acid gene 6 homolog (mouse) (STRA6), transcript variant 5, mRNA [NM_001142620]                       |
| 0 | -2.66919   | -3.8500729 | CSMD3          | Homo sapiens CUB and Sushi multiple domains 3 (CSMD3), transcript variant a, mRNA [NM_198123]                                                   |
| 0 | -2.6686573 | -2.8463907 | MYRIP          | SLAC2-C SLAC2C Homo sapiens myosin VIIA and Rab interacting protein (MYRIP), mRNA [NM_015460]                                                   |
| 0 | -2.6648397 | -3.8679824 | LOC100506923   | PREDICTED: Homo sapiens hypothetical LOC100506923 (LOC100506923), miscRNA [XR_108408]                                                           |
| 0 | -2.6445074 | -3.8461523 | REXO1L1        | GOR Homo sapiens REX1, RNA exonuclease 1 homolog (S. cerevisiae)-like 1 (REXO1L1), mRNA [NM_172239]                                             |
| 0 | -2.6378212 | -3.8284755 | LIMCH1         | LIMCH1A LMO7B Homo sapiens LIM and calponin homology domains 1 (LIMCH1), transcript variant 1, mRNA [NM_014988]                                 |
| 0 | -2.6215448 | -3.7575636 | ANKRD30B       | NY-BR-1.1 Homo sapiens ankyrin repeat domain 30B (ANKRD30B), mRNA [NM_001145029]                                                                |
| 0 | -2.62113   | -1.7323217 | XLOC_004874    | BROAD Institute lincRNA (XLOC_004874), lincRNA [TCONS_00010957]                                                                                 |
| 0 | -2.5896797 | -3.86139   | LINC00301      | C11orf64 NCRNA00301 Homo sapiens long intergenic non-protein coding RNA 301 (LINC00301), non-coding RNA [NR_026946]                             |
| 0 | -2.588574  | -4.0036554 | IFIT1B         | IFIT1L bA149I23.6 Homo sapiens interferon-induced protein with tetratricopeptide repeats 1B (IFIT1B), mRNA [NM_001010987]                       |
| 0 | -2.5852942 | -1.78476   | XLOC_004878    | BROAD Institute lincRNA (XLOC_004878), lincRNA [TCONS_00010375]                                                                                 |
| 0 | -2.576919  | -1.5710936 | MATN2          | Homo sapiens matrilin 2 (MATN2), transcript variant 2, mRNA [NM_030583]                                                                         |
| 0 | -2.518692  | -3.7118716 | SELE           | CD62E ELAM ELAM1 ES Homo sapiens selectin E (SELE), mRNA [NM_000450]                                                                            |
| 0 | -2.5160718 | -3.8768706 | XLOC_I2_012175 | BROAD Institute lincRNA (XLOC_I2_012175), lincRNA [TCONS_I2_00023859]                                                                           |
| 0 | -2.509128  | -1.619051  | XLOC_000702    | BROAD Institute lincRNA (XLOC_000702), lincRNA [TCONS_00002290]                                                                                 |
| 0 | -2.50347   | -1.660934  | SLC37A2        | pp11662 Homo sapiens solute carrier family 37 (glycerol-3-phosphate transporter), member 2 (SLC37A2), transcript variant 1, mRNA [NM_198277]    |
| 0 | -2.4645867 | -3.332777  | C7orf31        | Homo sapiens chromosome 7 open reading frame 31 (C7orf31), mRNA [NM_138811]                                                                     |
| 0 | -2.398849  | -2.3206182 | MIPEPP3        | LINC00539 Homo sapiens mRNA; cDNA DKFZp686C1238 (from clone DKFZp686C1238). [BX648740]                                                          |
| 0 | -2.3957453 | -3.59268   | MYCN           | MODED N-myc NMYC C Homo sapiens v-myc myelocytomatosis viral related oncogene, neuroblastoma derived (avian) (MYCN), mRNA [NM_005378]           |
| 0 | -2.3933396 | -3.5126972 | SCRT1          | SCRT ZNF898 Homo sapiens scratch homolog 1, zinc finger protein (Drosophila) (SCRT1), mRNA [NM_031309]                                          |
| 0 | -2.3838353 | -3.5066185 | LOC728573      | Homo sapiens cDNA FLJ41276 fis, clone BRAMY2036913. [AK123270]                                                                                  |
| 0 | -2.3646007 | -3.559133  | GJB7           | CX25 bA136M9.1 connexin gap junction protein, beta 7, 25kDa [Source:HGNC Symbol;Acc:16690] [ENST00000442973]                                    |
| 0 | -2.3615012 | -2.8569312 | KLHDC8A        | Homo sapiens kelch domain containing 8A (KLHDC8A), mRNA [NM_018203]                                                                             |
| 0 | -2.3606777 | -2.5042715 | XLOC_011797    | BROAD Institute lincRNA (XLOC_011797), lincRNA [TCONS_00024477]                                                                                 |
| 0 | -2.34965   | -3.552127  | XLOC_007064    | AGENCOURT_8903005 NIH_MGC.141 Homo sapiens cDNA clone IMAGE:6389455 5', mRNA sequence [BU590318]                                                |
| 0 | -2.3342662 | -3.5398684 | LOC100128531   | Homo sapiens uncharacterized LOC100128531 (LOC100128531), non-coding RNA [NR_038941]                                                            |
| 0 | -2.3269448 | -3.2018847 |                | Homo sapiens mRNA; cDNA DKFZp547H1510 (from clone DKFZp547H1510). [AL831877]                                                                    |
| 0 | -2.3259087 | -2.7552857 | XLOC_011774    | BROAD Institute lincRNA (XLOC_011774), lincRNA [TCONS_00024449]                                                                                 |
| 0 | -2.315988  | -3.5107403 | PTPRN2         | IA-2beta AR ICAAR PT Homo sapiens protein tyrosine phosphatase, receptor type, N polypeptide 2 (PTPRN2), transcript variant 1, mRNA [NM_002847] |
| 0 | -2.3124962 | -1.503798  | XLOC_000587    | BROAD Institute lincRNA (XLOC_000587), lincRNA [TCONS_00001308]                                                                                 |
| 0 | -2.28441   | -2.0306888 | FLJ26332       | Homo sapiens cDNA FLJ26332 fis, clone HRT02453. [AK129842]                                                                                      |
| 0 | -2.281344  | -2.9699001 | XLOC_011056    | BROAD Institute lincRNA (XLOC_011056), lincRNA [TCONS_00023122]                                                                                 |
| 0 | -2.2750077 | -3.14887   | XLOC_012851    | BROAD Institute lincRNA (XLOC_012851), lincRNA [TCONS_00026719]                                                                                 |
| 0 | -2.2615685 | -1.1478987 | PCSK5          | PC5 PC6 PC6A SPC6 Homo sapiens proprotein convertase subtilisin/kexin type 5 (PCSK5), transcript variant 2, mRNA [NM_006200]                    |
| 0 | -2.2578855 | -3.4492974 | XLOC_000506    | BROAD Institute lincRNA (XLOC_000506), lincRNA [TCONS_00000359]                                                                                 |
| 0 | -2.2553606 | -3.426083  | NAT2           | AAC2 NAT-2 PNAT Homo sapiens N-acetyltransferase 2 (arylamine N-acetyltransferase) (NAT2), mRNA [NM_000015]                                     |
| 0 | -2.2391586 | -3.4099646 |                | immunoglobulin heavy variable 6-1 [Source:HGNC Symbol;Acc:5662] [ENST00000390593]                                                               |
| 0 | -2.2325456 | -3.6936574 | XLOC_008434    | BROAD Institute lincRNA (XLOC_008434), lincRNA [TCONS_00018704]                                                                                 |
| 0 | -2.2255616 | -1.1641493 | LOC100505722   | PREDICTED: Homo sapiens hypothetical LOC100505722 (LOC100505722), miscRNA [XR_109304]                                                           |
| 0 | -2.196929  | -3.3803487 | KRTAP4-6       | KAP4.15 KAP4.6 KRTAP Homo sapiens keratin associated protein 4-6 (KRTAP4-6), mRNA [NM_030976]                                                   |
| 0 | -2.184043  | -3.3765059 | XLOC_006709    | BROAD Institute lincRNA (XLOC_006709), lincRNA [TCONS_00014616]                                                                                 |

|   |            |            |                |                                                                                                                                               |
|---|------------|------------|----------------|-----------------------------------------------------------------------------------------------------------------------------------------------|
| 0 | -2.18155   | -2.367436  | XLOC_005941    | UI-H-EU0-azk-k-10-0-UI.s1 NCI CGAP_Car1 Homo sapiens cDNA clone IMAGE: 5849985 3', mRNA sequence [BQ182905]                                   |
| 0 | -2.1610942 | -1.446857  | JPH3           | CAGL237 HDL2 JP-3 Jf Homo sapiens junctophilin 3 (JPH3), mRNA [NM_020655]                                                                     |
| 0 | -2.1601472 | -2.4183145 | RGS16          | A28-RGS14 A28-RGS1 Homo sapiens regulator of G-protein signaling 16 (RGS16), mRNA [NM_002928]                                                 |
| 0 | -2.1454434 | -1.7286863 | MYBL2          | B-MYB BMYB Homo sapiens v-myb myeloblastosis viral oncogene homolog (avian)-like 2 (MYBL2), mRNA [NM_002466]                                  |
| 0 | -2.1397128 | -3.1006932 | XLOC_008774    | BROAD Institute lincRNA (XLOC_008774), lincRNA [TCONS_00017947]                                                                               |
| 0 | -2.1395025 | -3.3346257 |                | olfactory receptor, family 11, subfamily H, member 7 (gene/pseudogene) [Source:HGNC Symbol;Acc:15350] [ENST00000553765]                       |
| 0 | -2.1018276 | -1.4657469 | XLOC_I2_001359 | Q3SDF2_PART2 (Q3SDF2) EPI21 protein, partial (5%) [THC2694828]                                                                                |
| 0 | -2.0941496 | -3.2879171 | SNORD115-2     | Homo sapiens small nucleolar RNA, C/D box 115-2 (SNORD115-2), small nucleolar RNA [NR_003294]                                                 |
| 0 | -2.0871086 | -3.894784  | XLOC_006951    | BX108468 Soares_testis_NHT Homo sapiens cDNA clone IMAGp998J144405, mRNA sequence [BX108468]                                                  |
| 0 | -2.0536985 | -3.2478924 | XLOC_009144    | BROAD Institute lincRNA (XLOC_009144), lincRNA [TCONS_00019311]                                                                               |
| 0 | -2.0481334 | -2.0087762 | KCNQ4          | DFNA2 DFNA2A KV7.4 Homo sapiens potassium voltage-gated channel, KQT-like subfamily, member 4 (KCNQ4), transcript variant 1, mRNA [NM_004700] |
| 0 | -2.0478902 | -3.2513642 | XLOC_I2_011095 | BROAD Institute lincRNA (XLOC_I2_011095), lincRNA [TCONS_I2_00021856]                                                                         |
| 0 | -2.0478034 | -2.0378246 | FLJ12334       | Homo sapiens uncharacterized LOC400946 (FLJ12334), non-coding RNA [NR_033875]                                                                 |
| 0 | -2.0408115 | -3.4669628 | XLOC_000446    | BROAD Institute lincRNA (XLOC_000446), lincRNA [TCONS_00000327]                                                                               |
| 0 | -2.0391765 | -3.2239785 | XLOC_009605    | BROAD Institute lincRNA (XLOC_009605), lincRNA [TCONS_00019805]                                                                               |
| 0 | -2.0095305 | -3.2024355 | XLOC_003387    | BROAD Institute lincRNA (XLOC_003387), lincRNA [TCONS_00006757]                                                                               |
| 0 | -1.9923334 | -3.1939378 | OR1D5          | C17orf2 OR17-2 OR17- Homo sapiens olfactory receptor, family 1, subfamily D, member 5 (OR1D5), mRNA [NM_014566]                               |
| 0 | -1.9900599 | -3.200612  | XLOC_004839    | BROAD Institute lincRNA (XLOC_004839), lincRNA [TCONS_00010350]                                                                               |
| 0 | -1.9846325 | -1.6409907 | HNF4G          | NR2A2 NR2A3 hepatocyte nuclear factor 4, gamma [Source:HGNC Symbol;Acc:5026] [ENST00000396419]                                                |
| 0 | -1.9649158 | -3.1877875 | XLOC_I2_009216 | BROAD Institute lincRNA (XLOC_I2_009216), lincRNA [TCONS_I2_00017234]                                                                         |
| 0 | -1.9272666 | -2.5254693 | LAMA4          | LAMA3 LAMA4*-1 Homo sapiens laminin, alpha 4 (LAMA4), transcript variant 3, mRNA [NM_001105207]                                               |
| 0 | -1.9270968 | -3.1304202 |                | BX093647 Soares_testis_NHT Homo sapiens cDNA clone IMAGp998F023561 ; IMAGE:1409665, mRNA sequence [BX093647]                                  |
| 0 | -1.9243431 | -1.4084883 | TNRC6C         | Homo sapiens trinucleotide repeat containing 6C (TNRC6C), transcript variant 1, mRNA [NM_001142640]                                           |
| 0 | -1.9172974 | -2.3211799 | XLOC_009152    | BROAD Institute lincRNA (XLOC_009152), lincRNA [TCONS_00019914]                                                                               |
| 0 | -1.9161887 | -1.6992121 | XLOC_I2_007449 | BROAD Institute lincRNA (XLOC_I2_007449), lincRNA [TCONS_I2_00013842]                                                                         |
| 0 | -1.9159961 | -3.1193051 | XIST           | Homo sapiens X (inactive)-specific transcript (non-protein coding) (XIST), non-coding RNA [NR_001564]                                         |
| 0 | -1.9067798 | -1.6977077 | GNG4           | Homo sapiens guanine nucleotide binding protein (G protein), gamma 4 (GNG4), transcript variant 1, mRNA [NM_001098722]                        |
| 0 | -1.904398  | -1.1191063 | XLOC_013952    | BROAD Institute lincRNA (XLOC_013952), lincRNA [TCONS_00029031]                                                                               |
| 0 | -1.8908734 | -1.166347  | LOC645262      | PREDICTED: Homo sapiens phosphodiesterase 4D interacting protein-like (LOC645262), mRNA [XM_003403419]                                        |
| 0 | -1.8890991 | -3.4179997 | LOC100129572   | Homo sapiens cDNA FLJ38722 fis, clone KIDNE2010084. [AK096041]                                                                                |
| 0 | -1.8866005 | -2.3796916 | CXorf61        | CT83 KK-LC-1 KKLC1 Homo sapiens chromosome X open reading frame 61 (CXorf61), mRNA [NM_001017978]                                             |
| 0 | -1.886539  | -3.0666947 | DDX25          | GRTH Homo sapiens DEAD (Asp-Glu-Ala-Asp) box polypeptide 25 (DDX25), mRNA [NM_013264]                                                         |
| 0 | -1.8806214 | -3.043754  | VTCN1          | B7-H4 B7H4 B7S1 B7X  Homo sapiens V-set domain containing T cell activation inhibitor 1 (VTCN1), mRNA [NM_024626]                             |
| 0 | -1.8611178 | -3.0601172 | XLOC_I2_009493 | BROAD Institute lincRNA (XLOC_I2_009493), lincRNA [TCONS_I2_00017938]                                                                         |
| 0 | -1.8594155 | -2.3572755 | XLOC_012863    | BROAD Institute lincRNA (XLOC_012863), lincRNA [TCONS_00026542]                                                                               |
| 0 | -1.8592281 | -1.3057041 | XLOC_005371    | PREDICTED: Homo sapiens hypothetical LOC100506908 (LOC100506908), miscRNA [XR_108615]                                                         |
| 0 | -1.8478813 | -3.0421677 | XLOC_004427    | DB294021 Y79AA1 Homo sapiens cDNA clone Y79AA1000242 5', mRNA sequence [DB294021]                                                             |
| 0 | -1.8313565 | -3.0301528 | XLOC_013611    | BROAD Institute lincRNA (XLOC_013611), lincRNA [TCONS_00027982]                                                                               |
| 0 | -1.8304877 | -3.042728  |                | tetratricopeptide repeat domain 6 [Source:HGNC Symbol;Acc:19739] [ENST00000382320]                                                            |
| 0 | -1.8283806 | -3.023085  | CALHM2         | FAM26B calcium homeostasis modulator 2 [Source:HGNC Symbol;Acc:23493] [ENST00000393235]                                                       |
| 0 | -1.8208241 | -1.7290006 | XLOC_000909    | Q2QUZ4_ORYSA (Q2QUZ4) Tetraspanin family, partial (5%) [THC2731633]                                                                           |
| 0 | -1.8203163 | -1.2976165 | XLOC_009813    | 602695014F1 NIH_MGC_97 Homo sapiens cDNA clone IMAGE:4827386 5', mRNA sequence [BG721449]                                                     |
| 0 | -1.8168406 | -2.720613  | XLOC_I2_010863 |                                                                                                                                               |
| 0 | -1.8087773 | -1.6241236 | DISC1          | Homo sapiens disrupted in schizophrenia 1 (DISC1), transcript variant q, mRNA [NM_001164554]                                                  |
| 0 | -1.8046427 | -3.0065188 | PCDH19         | EFMR EIEE9 Homo sapiens protocadherin 19 (PCDH19), transcript variant 3, mRNA [NM_001184880]                                                  |
| 0 | -1.7932129 | -2.7960358 | ACR            | Homo sapiens acrosin (ACR), mRNA [NM_001097]                                                                                                  |
| 0 | -1.7825966 | -1.3708444 | MPZL3          | Homo sapiens myelin protein zero-like 3 (MPZL3), mRNA [NM_198275]                                                                             |
| 0 | -1.7800794 | -1.1790915 | PCSK5          | PC5 PC6 PC6A SPC6 Homo sapiens proprotein convertase subtilisin/kexin type 5 (PCSK5), transcript variant 2, mRNA [NM_006200]                  |
| 0 | -1.77494   | -1.2791562 | DENND1B        | C1ORF18 C1orf218 FAN Homo sapiens DENN/MADD domain containing 1B (DENND1B), transcript variant 3, mRNA [NM_001195215]                         |
| 0 | -1.7701249 | -2.1753922 | SYN3           | Homo sapiens synapsin III (SYN3), transcript variant IIIa, mRNA [NM_003490]                                                                   |
| 0 | -1.7642002 | -1.3587527 | SLC9A5         | NHE5 solute carrier family 9 (sodium/hydrogen exchanger), member 5 [Source:HGNC Symbol;Acc:11078] [ENST00000360183]                           |
| 0 | -1.7581501 | -1.7626977 | ZNF214         | BAZ-1 BAZ1 Homo sapiens zinc finger protein 214 (ZNF214), mRNA [NM_013249]                                                                    |
| 0 | -1.752851  | -1.4429626 | CA1            | CA-1 CAB Car1 Homo sapiens carbonic anhydrase I (CA1), transcript variant 2, mRNA [NM_001738]                                                 |
| 0 | -1.7390709 | -2.9326315 | XLOC_001596    | BROAD Institute lincRNA (XLOC_001596), lincRNA [TCONS_00003801]                                                                               |
| 0 | -1.7381363 | -1.2102847 | XLOC_006623    | BROAD Institute lincRNA (XLOC_006623), lincRNA [TCONS_00013981]                                                                               |
| 0 | -1.7228937 | -1.8397512 | CCDC163P       | C1orf231 Homo sapiens coiled-coil domain containing 163, pseudogene (CCDC163P), transcript variant 1, non-coding RNA [NR_033298]              |
| 0 | -1.7185345 | -2.0554976 | MED23          | ARC130 CRSP130 CRSF Homo sapiens mediator complex subunit 23 (MED23), transcript variant 2, mRNA [NM_015979]                                  |
| 0 | -1.7157836 | -1.1053996 | NHLRC1         | EPM2A EPM2B MALIN b Homo sapiens NHL repeat containing 1 (NHLRC1), mRNA [NM_198586]                                                           |
| 0 | -1.7154455 | -1.1412711 |                | PREDICTED: Homo sapiens hypothetical LOC100506484 (LOC100506484), miscRNA [XR_108364]                                                         |
| 0 | -1.712338  | -1.2877874 | MOXD2P         | MOXD2 Homo sapiens monooxygenase, DBH-like 2, pseudogene (MOXD2P), non-coding RNA [NR_024346]                                                 |

|   |            |            |                |                      |                                                                                                                                            |
|---|------------|------------|----------------|----------------------|--------------------------------------------------------------------------------------------------------------------------------------------|
| 0 | -1.7014294 | -1.6909008 | SAGE1          | CT14 SAGE            | Homo sapiens sarcoma antigen 1 (SAGE1), mRNA [NM_018666]                                                                                   |
| 0 | -1.6991897 | -1.1655412 | LOC729159      |                      | PREDICTED: Homo sapiens UPF0607 protein ENSP00000381418-like (LOC729159), mRNA [XM_001129515]                                              |
| 0 | -1.6903462 | -1.5381908 |                |                      | Homo sapiens cDNA, FLJ97323. [AK307375]                                                                                                    |
| 0 | -1.687222  | -2.8949065 | C4orf6         | aC1                  | Homo sapiens chromosome 4 open reading frame 6 (C4orf6), mRNA [NM_005750]                                                                  |
| 0 | -1.6858077 | -1.7843723 | SERPINA3       | AACT ACT GIG25       | Homo sapiens serpin peptidase inhibitor, clade A (alpha-1 antiproteinase, antitrypsin), member 3 (SERPINA3), mRNA [NM_001085]              |
| 0 | -1.6842704 | -2.0393772 | THAP7-AS1      |                      | Homo sapiens THAP7 antisense RNA 1 (non-protein coding) (THAP7-AS1), transcript variant 1, non-coding RNA [NR_027051]                      |
| 0 | -1.6826763 | -2.8519855 | XLOC_006043    |                      | PREDICTED: Homo sapiens hypothetical LOC100506725, transcript variant 2 (LOC100506725), miscRNA [XR_108768]                                |
| 0 | -1.6802359 | -1.2649069 | XLOC_003674    |                      | BROAD Institute lincRNA (XLOC_003674), lincRNA [TCONS_00008213]                                                                            |
| 0 | -1.6689167 | -2.9290938 | PHF20L1        |                      | PHD finger protein 20-like 1 [Source:HGNC Symbol;Acc:24280] [ENST00000361997]                                                              |
| 0 | -1.668571  | -1.1896005 | XLOC_I2_005692 |                      | BROAD Institute lincRNA (XLOC_I2_005692), lincRNA [TCONS_I2_00010604]                                                                      |
| 0 | -1.6657157 | -1.4610658 | XLOC_002595    |                      | BROAD Institute lincRNA (XLOC_002595), lincRNA [TCONS_00005964]                                                                            |
| 0 | -1.6524887 | -1.5352645 | AGXT           | AGT AGT1 AGXT1 PH1   | Homo sapiens alanine-glyoxylate aminotransferase (AGXT), mRNA [NM_000030]                                                                  |
| 0 | -1.6514959 | -3.3514957 |                |                      | Q6E5H0_VERDA (Q6E5H0) NADH dehydrogenase subunit 1 (Fragment), partial (8%) [THC2754661]                                                   |
| 0 | -1.6502047 | -1.2475266 | LOC100507134   |                      | PREDICTED: Homo sapiens hypothetical LOC100507134 (LOC100507134), miscRNA [XR_108488]                                                      |
| 0 | -1.6498513 | -2.829361  | MKRN9P         | MKRN5 MKRN9 MKRN9P   | Homo sapiens makorin ring finger protein pseudogene 6, mRNA (cDNA clone IMAGE:5278542). [BC067894]                                         |
| 0 | -1.6486678 | -1.9513164 | CTAG2          | CAMEL CT2 CT6.2 CT6  | Homo sapiens cancer/testis antigen 2 (CTAG2), transcript variant 2, mRNA [NM_020994]                                                       |
| 0 | -1.6337047 | -1.1169586 |                |                      | Uncharacterized protein [Source:UniProtKB/TrEMBL;Acc:E5RGS3] [ENST00000519738]                                                             |
| 0 | -1.6315503 | -1.0629668 | XLOC_003803    |                      | BROAD Institute lincRNA (XLOC_003803), lincRNA [TCONS_00008949]                                                                            |
| 0 | -1.6217799 | -2.8212395 | XLOC_004653    |                      | BROAD Institute lincRNA (XLOC_004653), lincRNA [TCONS_00010185]                                                                            |
| 0 | -1.6146727 | -2.809309  | XLOC_002621    |                      | BROAD Institute lincRNA (XLOC_002621), lincRNA [TCONS_00005996]                                                                            |
| 0 | -1.611887  | -2.8076138 | LINC00116      | NCRNA00116           | Homo sapiens long intergenic non-protein coding RNA 116 (LINC00116), non-coding RNA [NR_027063]                                            |
| 0 | -1.6100307 | -2.8295808 | XLOC_002356    |                      | DA017974 ADRGL2 Homo sapiens cDNA clone ADRGL2012306 5', mRNA sequence [DA017974]                                                          |
| 0 | -1.6044307 | -1.2153182 | ARHGEF19       | WGEF                 | Homo sapiens Rho guanine nucleotide exchange factor (GEF) 19 (ARHGEF19), mRNA [NM_153213]                                                  |
| 0 | -1.6036053 | -1.1810021 | XLOC_002716    |                      | BROAD Institute lincRNA (XLOC_002716), lincRNA [TCONS_00006104]                                                                            |
| 0 | -1.596745  | -2.746243  | MTRNR2L5       |                      | Homo sapiens MT-RNR2-like 5 (MTRNR2L5), mRNA [NM_001190478]                                                                                |
| 0 | -1.5953531 | -1.785428  | SERPINE3       |                      | Homo sapiens serpin peptidase inhibitor, clade E (nexin, plasminogen activator inhibitor type 1), member 3 (SERPINE3), mRNA [NM_001101320] |
| 0 | -1.593143  | -2.0054278 | XLOC_013370    |                      | BROAD Institute lincRNA (XLOC_013370), lincRNA [TCONS_00027385]                                                                            |
| 0 | -1.5908251 | -2.785554  | XLOC_008269    |                      | BROAD Institute lincRNA (XLOC_008269), lincRNA [TCONS_00017391]                                                                            |
| 0 | -1.5881262 | -1.1149573 | DISC1          |                      | Homo sapiens disrupted in schizophrenia 1 (DISC1), transcript variant n, mRNA [NM_001164551]                                               |
| 0 | -1.5754952 | -2.7728906 | ATP4B          | ATP6B                | Homo sapiens ATPase, H <sup>+</sup> /K <sup>+</sup> exchanging, beta polypeptide (ATP4B), mRNA [NM_000705]                                 |
| 0 | -1.5634899 | -2.7343125 | XLOC_I2_013124 |                      |                                                                                                                                            |
| 0 | -1.5627961 | -2.823433  |                |                      | coiled-coil domain containing 162, pseudogene [Source:HGNC Symbol;Acc:21565] [ENST00000440451]                                             |
| 0 | -1.5610323 | -1.2201924 |                |                      | PREDICTED: Homo sapiens hypothetical protein LOC100128064 (LOC100128064), mRNA [XM_001725877]                                              |
| 0 | -1.5572367 | -1.7081962 | XLOC_005730    |                      | zt85h04.r1 Soares_testis_NHT Homo sapiens cDNA clone IMAGE:729175 5', mRNA sequence [AA397666]                                             |
| 0 | -1.5532355 | -2.8085847 | GIPC3          | C19orf64 DFNB15 DFNE | Homo sapiens GIPC PDZ domain containing family, member 3 (GIPC3), mRNA [NM_133261]                                                         |
| 0 | -1.5427928 | -2.9652715 | CALB1          | CALB                 | Homo sapiens calbindin 1, 28kDa (CALB1), mRNA [NM_004929]                                                                                  |
| 0 | -1.5404797 | -2.7426949 | LOC100131822   |                      | Homo sapiens cDNA FLJ46421 fis, clone THYMU3013197. [AK128841]                                                                             |
| 0 | -1.5366573 | -2.7227197 | XLOC_I2_013295 |                      | BROAD Institute lincRNA (XLOC_I2_013295), lincRNA [TCONS_I2_00025695]                                                                      |
| 0 | -1.5341783 | -1.0758605 | XLOC_001265    |                      |                                                                                                                                            |
| 0 | -1.5266032 | -2.72184   | LOC100507410   |                      | Homo sapiens uncharacterized LOC100507410 (LOC100507410), transcript variant 1, non-coding RNA [NR_040018]                                 |
| 0 | -1.5257411 | -2.787929  | KIAA0040       |                      | Homo sapiens KIAA0040 (KIAA0040), transcript variant 2, mRNA [NM_014656]                                                                   |
| 0 | -1.5231752 | -1.33107   | LOC285419      |                      | Homo sapiens uncharacterized LOC285419 (LOC285419), transcript variant 2, non-coding RNA [NR_027106]                                       |
| 0 | -1.5227737 | -1.1994648 |                |                      | major histocompatibility complex, class I, P (pseudogene) [Source:HGNC Symbol;Acc:21196] [ENST00000411514]                                 |
| 0 | -1.5145192 | -1.0509543 | CDRT8          |                      | qf35h11.x1 Soares_testis_NHT Homo sapiens cDNA clone IMAGE:1752069 3', mRNA sequence [AI150443]                                            |
| 0 | -1.5017343 | -1.718061  | P39192         |                      | ALU5_HUMAN (P39192) Alu subfamily SC sequence contamination warning entry, partial (13%) [THC2717546]                                      |
| 0 | -1.4937072 | -2.7057037 | XLOC_I2_011922 |                      | BROAD Institute lincRNA (XLOC_I2_011922), lincRNA [TCONS_I2_00023650]                                                                      |
| 0 | -1.4932408 | -2.0528111 | LOC339788      |                      | Homo sapiens uncharacterized LOC339788 (LOC339788), non-coding RNA [NR_015405]                                                             |
| 0 | -1.4927115 | -1.0049424 | XLOC_000939    |                      | BROAD Institute lincRNA (XLOC_000939), lincRNA [TCONS_00001609]                                                                            |
| 0 | -1.4909563 | -1.1194072 |                |                      | hydroxysteroid (17-beta) dehydrogenase 1 pseudogene 1 [Source:HGNC Symbol;Acc:5216] [ENST00000442612]                                      |
| 0 | -1.4869871 | -1.254005  | ACE2           | ACEH                 | Homo sapiens angiotensin I converting enzyme (peptidyl-dipeptidase A) 2 (ACE2), mRNA [NM_021804]                                           |
| 0 | -1.486721  | -2.4969769 | LOC339666      |                      | Homo sapiens uncharacterized LOC339666 (LOC339666), non-coding RNA [NR_038918]                                                             |
| 0 | -1.4867129 | -1.2310629 | XLOC_006980    |                      | BROAD Institute lincRNA (XLOC_006980), lincRNA [TCONS_00014913]                                                                            |
| 0 | -1.4845004 | -1.4474082 | XLOC_014364    |                      | PT1.3_03_G05.r tumor1 Homo sapiens cDNA 5', mRNA sequence [AI525606]                                                                       |
| 0 | -1.4836206 | -2.6696625 | XLOC_009500    |                      | BROAD Institute lincRNA (XLOC_009500), lincRNA [TCONS_00019702]                                                                            |
| 0 | -1.4817605 | -1.5213866 | LOC100616530   |                      | Homo sapiens tospeak (LOC100616530), transcript variant 6, non-coding RNA [NR_038206]                                                      |
| 0 | -1.4795513 | -2.6806145 | XLOC_004227    |                      | BROAD Institute lincRNA (XLOC_004227), lincRNA [TCONS_00009205]                                                                            |
| 0 | -1.4769297 | -2.614676  | STAB1          | CLEVER-1 FEEL-1 FEL  | Homo sapiens stabilin 1 (STAB1), mRNA [NM_015136]                                                                                          |
| 0 | -1.4753289 | -2.6769614 | XLOC_014263    |                      | BROAD Institute lincRNA (XLOC_014263), lincRNA [TCONS_00029612]                                                                            |
| 0 | -1.4712148 | -1.7310967 | GOLGA6L1       |                      | Homo sapiens golgin A6 family-like 1 (GOLGA6L1), mRNA [NM_001001413]                                                                       |
| 0 | -1.4665656 | -1.8090887 | DNAH10         |                      | Homo sapiens dynein, axonemal, heavy chain 10 (DNAH10), mRNA [NM_207437]                                                                   |

|   |            |             |                |                                                                                                                                                 |
|---|------------|-------------|----------------|-------------------------------------------------------------------------------------------------------------------------------------------------|
| 0 | -1.4631457 | -2.5956569  | XLOC_I2_003292 | BROAD Institute lincRNA (XLOC_I2_003292), lincRNA [TCONS_I2_00006110]                                                                           |
| 0 | -1.4622145 | -1.3484554  | RPS6KL1        | Homo sapiens ribosomal protein S6 kinase-like 1 (RPS6KL1), mRNA [NM_031464]                                                                     |
| 0 | -1.4597192 | -1.6780457  | HTATSF1P2      | Homo sapiens mRNA; cDNA DKFZp686I2072 (from clone DKFZp686I2072). [BX648511]                                                                    |
| 0 | -1.4554381 | -2.677105   | XLOC_011583    | PREDICTED: Homo sapiens hypothetical LOC100507166 (LOC100507166), miscRNA [XR_109222]                                                           |
| 0 | -1.4532342 | -1.5106168  | ARSD-AS1       | PREDICTED: Homo sapiens hypothetical LOC100506356 (LOC100506356), miscRNA [XR_110924]                                                           |
| 0 | -1.4525714 | -1.3560691  | ALOX15         | 15-LOX-1 15LOX-1 Homo sapiens arachidonate 15-lipoxygenase (ALOX15), mRNA [NM_001140]                                                           |
| 0 | -1.4524384 | -2.7867951  | ARL9           | Homo sapiens ADP-ribosylation factor-like 9 (ARL9), mRNA [NM_206919]                                                                            |
| 0 | -1.4461813 | -1.1654143  | XLOC_006181    | 602722001F1 NIH_MGC_97 Homo sapiens cDNA clone IMAGE:4838689 5', mRNA sequence [BG773244]                                                       |
| 0 | -1.3991346 | -1.7584057  | AQP8           | AQP-8 Homo sapiens aquaporin 8 (AQP8), mRNA [NM_001169]                                                                                         |
| 0 | -1.3970003 | -1.3103123  | XLOC_011299    | BROAD Institute lincRNA (XLOC_011299), lincRNA [TCONS_00023453]                                                                                 |
| 0 | -1.3905864 | -2.9039469  | FUT9           | Fuc-TIX Homo sapiens fucosyltransferase 9 (alpha (1,3) fucosyltransferase) (FUT9), mRNA [NM_006581]                                             |
| 0 | -1.3827972 | -1.8840685  | RIBC1          | 2610028I09Rik Homo sapiens RIB43A domain with coiled-coils 1 (RIBC1), transcript variant 1, mRNA [NM_001031745]                                 |
| 0 | -1.3636084 | -1.7862811  | LOC390937      | PREDICTED: Homo sapiens Ets2 repressor factor-like (LOC390937), mRNA [XM_003403707]                                                             |
| 0 | -1.340497  | -2.6471972  | LOC100508751   | PREDICTED: Homo sapiens hypothetical LOC100508751 (LOC100508751), miscRNA [XR_112271]                                                           |
| 0 | -1.3398237 | -1.234201   | NRIP3          | C11orf14 NY-SAR-105 Homo sapiens nuclear receptor interacting protein 3 (NRIP3), mRNA [NM_020645]                                               |
| 0 | -1.3258269 | -4.2729397  | EFR3B          | KIAA0953 Homo sapiens mRNA for KIAA0953 protein, partial cds. [AB023170]                                                                        |
| 0 | -1.3106155 | -1.0370722  | XLOC_003225    | BROAD Institute lincRNA (XLOC_003225), lincRNA [TCONS_00007244]                                                                                 |
| 0 | -1.3068638 | -1.103262   | DMBX1          | MBX OTX3 PAXB Homo sapiens diencephalon/mesencephalon homeobox 1 (DMBX1), transcript variant 2, mRNA [NM_147192]                                |
| 0 | -1.2986679 | -1.1673393  | PTPN5          | PTPSTEP STEP Homo sapiens protein tyrosine phosphatase, non-receptor type 5 (striatum-enriched) (PTPN5), transcript variant 1, mRNA [NM_006906] |
| 0 | -1.29192   | -1.4752393  | XLOC_002735    | BROAD Institute lincRNA (XLOC_002735), lincRNA [TCONS_00006134]                                                                                 |
| 0 | -1.2623305 | -2.3774362  | XLOC_006008    | BROAD Institute lincRNA (XLOC_006008), lincRNA [TCONS_00013372]                                                                                 |
| 0 | -1.261457  | -1.377028   | RGS11          | RS11 Homo sapiens regulator of G-protein signaling 11 (RGS11), transcript variant 2, mRNA [NM_003834]                                           |
| 0 | -1.2556262 | -1.531507   |                | Homo sapiens cDNA FLJ16171 fis, clone BRHIP2003272. [AK131247]                                                                                  |
| 0 | -1.2523031 | -1.2737966  | LEPR           | CD295 LEP-R OB-R OB Homo sapiens leptin receptor (LEPR), transcript variant 3, mRNA [NM_001003679]                                              |
| 0 | -1.2517707 | -1.0332451  | TM6SF1         | Homo sapiens transmembrane 6 superfamily member 1 (TM6SF1), transcript variant 1, mRNA [NM_023003]                                              |
| 0 | -1.2356224 | -2.0959735  | XLOC_006283    | BROAD Institute lincRNA (XLOC_006283), lincRNA [TCONS_00014228]                                                                                 |
| 0 | -1.2240372 | -1.6847954  | EME2           | SLX2B gs125 Homo sapiens essential meiotic endonuclease 1 homolog 2 (S. pombe) (EME2), mRNA [NM_001010865]                                      |
| 0 | -1.2072263 | -2.10017014 | ATP2B1         | PMCA1 PMCA1kb Homo sapiens ATPase, Ca <sup>++</sup> transporting, plasma membrane 1 (ATP2B1), transcript variant 1, mRNA [NM_001001323]         |
| 0 | -1.1976624 | -2.1970782  | HMGA1P7        | Homo sapiens high mobility group AT-hook 1 pseudogene 7 (HMGA1P7), non-coding RNA [NR_037938]                                                   |
| 0 | -1.195622  | -2.0337524  |                | Q2RH40_MOOTA (Q2RH40) Inner-membrane translocator, partial (5%) [THC2750096]                                                                    |
| 0 | -1.1923385 | -1.2490535  | SUN3           | SUNC1 Homo sapiens Sad1 and UNC84 domain containing 3 (SUN3), transcript variant 1, mRNA [NM_001030019]                                         |
| 0 | -1.1894283 | -2.2780585  | SIRPD          | PTPNS1L2 dJ576H24.4 Homo sapiens signal-regulatory protein delta (SIRPD), mRNA [NM_178460]                                                      |
| 0 | -1.1857204 | -1.1967411  | KRTAP20-3      | KAP19D KAP20.3 KRTA Homo sapiens keratin associated protein 20-3 (KRTAP20-3), mRNA [NM_001128077]                                               |
| 0 | -1.176044  | -1.7889819  | CXADRP3        | Homo sapiens coxsackievirus and adenovirus receptor pseudogene 3 (CXADRP3), non-coding RNA [NR_024076]                                          |
| 0 | -1.1735463 | -1.2267842  | XLOC_I2_001222 | BROAD Institute lincRNA (XLOC_I2_001222), lincRNA [TCONS_I2_00002729]                                                                           |
| 0 | -1.1472521 | -1.5215364  | SNORD125       | Homo sapiens small nucleolar RNA, C/D box 125 (SNORD125), small nucleolar RNA [NR_003686]                                                       |
| 0 | -1.1395783 | -3.4581666  | LOC100506414   | PREDICTED: Homo sapiens hypothetical LOC100506414 (LOC100506414), miscRNA [XR_108963]                                                           |
| 0 | -1.1375346 | -2.1336613  | XLOC_000377    | BROAD Institute lincRNA (XLOC_000377), lincRNA [TCONS_00000293]                                                                                 |
| 0 | -1.1139574 | -3.0123954  | XLOC_010743    | Q8RLX7_STRPY (Q8RLX7) Collagen-like protein 2, partial (6%) [THC2606148]                                                                        |
| 0 | -1.1121006 | -1.2405043  | XLOC_001642    | BROAD Institute lincRNA (XLOC_001642), lincRNA [TCONS_00003836]                                                                                 |
| 0 | -1.109591  | -1.2789321  | LOC729860      | Homo sapiens cDNA FLJ41667 fis, clone FEBRA2028366. [AK123661]                                                                                  |
| 0 | -1.1076908 | -1.632616   | LOC100129373   | Homo sapiens cDNA FLJ46014 fis, clone SPLEN2011252. [AK127907]                                                                                  |
| 0 | -1.0921273 | -1.0426769  | ADAM18         | ADAM27 tMDCIII Homo sapiens ADAM metalloproteinase domain 18 (ADAM18), transcript variant 1, mRNA [NM_014237]                                   |
| 0 | -1.0870996 | -1.0338869  | PROP1          | CPHD2 PROP-1 Homo sapiens PROP paired-like homeobox 1 (PROP1), mRNA [NM_006261]                                                                 |
| 0 | -1.0848973 | -2.1177006  | CCDC144A       | Homo sapiens coiled-coil domain containing 144A (CCDC144A), mRNA [NM_014695]                                                                    |
| 0 | -1.0679865 | -1.4335551  | LOC257396      | Homo sapiens uncharacterized LOC257396 (LOC257396), non-coding RNA [NR_034107]                                                                  |
| 0 | -1.0628457 | -2.37569    | ZNF584         | zinc finger protein 584 [Source:HGNC Symbol;Acc:27318] [ENST00000354635]                                                                        |
| 0 | -1.060601  | -4.1016335  | GALM           | IBD1 Homo sapiens galactose mutarotase (aldose 1-epimerase) (GALM), mRNA [NM_138801]                                                            |
| 0 | -1.0527034 | -2.0380564  | XLOC_I2_002100 | CR741727 Soares_testis_NHT Homo sapiens cDNA clone IMAGp91J0269 ; IMAGE:1641700 5', mRNA sequence [CR741727]                                    |
| 0 | -1.0505795 | -1.9714723  | XLOC_007488    | BROAD Institute lincRNA (XLOC_007488), lincRNA [TCONS_00016096]                                                                                 |
| 0 | -1.0486655 | -1.4175453  | PAPD5          | TRF4-2 Homo sapiens PAP associated domain containing 5 (PAPD5), transcript variant 1, mRNA [NM_001040284]                                       |
| 0 | -1.0399017 | -1.5837021  | BCKDHA         | BCKDE1A MSU MSUD1 branched chain keto acid dehydrogenase E1, alpha polypeptide [Source:HGNC Symbol;Acc:986] [ENST00000378196]                   |
| 0 | -1.0378156 | -1.0221763  | MAML3          | CAGH3 ERDA3 GDN MA Homo sapiens mastermind-like 3 (Drosophila) (MAML3), mRNA [NM_018717]                                                        |
| 0 | -1.0282683 | -2.3889174  | XLOC_000211    | BROAD Institute lincRNA (XLOC_000211), lincRNA [TCONS_00000953]                                                                                 |
| 0 | -1.0112336 | -1.2552242  | ATG4C          | APG4-C APG4C AUTL1 Homo sapiens ATG4 autophagy related 4 homolog C (S. cerevisiae) (ATG4C), transcript variant 1, mRNA [NM_032852]              |
| 0 | -1.0109515 | -1.2060361  | NCAM1          | CD56 MSK39 NCAM Homo sapiens neural cell adhesion molecule 1 (NCAM1), transcript variant 3, mRNA [NM_001076682]                                 |
| 0 | -1.0046666 | -1.2523179  | LINC00339      | Homo sapiens long intergenic non-protein coding RNA 339 (LINC00339), transcript variant 1, non-coding RNA [NR_023918]                           |
